# Supplementary material for: Pan-cancer analysis and in vitro validation of the oncogenic and prognostic roles of AURKA in human cancers
Source: Front Oncol. 2023 Oct 27;13:1186101. doi: 10.3389/fonc.2023.1186101 (PMC10642189; doi:10.3389/fonc.2023.1186101)
Supplement: Supplementary file 10 [file Table_1.xlsx]

## Sheet: Sheet1
Abbreviation	Cancer full name
ACC	Adrenocortical Cancer
BLCA	Bladder Cancer
BRCA	Breast Cancer
CESC	Cervical Cancer
CHOL	Bile Duct Cancer
COAD	Colon Cancer
DLBC	Large B-cell Lymphoma
ESCA	Esophageal Cancer
GBM	Esophageal Cancer
HNSC	Head and Neck Cancer
KICH	Kidney Chromophobe
KIRC	Kidney Chromophobe
KIRP	Kidney Papillary Cell Carcinoma
LAML	Acute Myeloid Leukemia
LGG	Lower Grade Glioma
LIHC	Liver Cancer
LUAD	Lung Adenocarcinoma
LUNG	Lung Cancer
LUSC	Lung Squamous Cell Carcinoma
MESO	Mesothelioma
OV	Ovarian Cancer
PAAD	Pancreatic Cancer
PRAD	Prostate Cancer
READ	Rectal Cancer
SARC	Sarcoma
SKCM	Melanoma
STAD	Stomach Cancer
TGCT	Testicular Cancer
THCA	Thyroid Cancer
THYM	Thyroid Cancer
UCEC	Endometrioid Cancer
UCS	Uterine Carcinosarcoma
UVM	Ocular melanomas
